# Supplementary material for: Impact of Anthropogenic Activities on the Dissemination of ARGs in the Environment—A Review
Source: MDPI journal article supplement (doi:10.3390/ijerph191912853), 2022-10-07
Supplement: s1 [file s1]

*Supplementary materials*

# **Impact of anthropogenic activities on the dissemination of ARGs in the environment—A review**

**Małgorzata Czatzkowska, Izabela Wolak, Monika Harnisz and Ewa Korzeniewska \***

Department of Water Protection Engineering and Environmental Microbiology, Faculty of Geoengineering, University of Warmia and Mazury in Olsztyn, Prawocheńskiego 1, 10-720 Olsztyn, Poland

\* Correspondence: ewa.korzeniewska@uwm.edu.pl

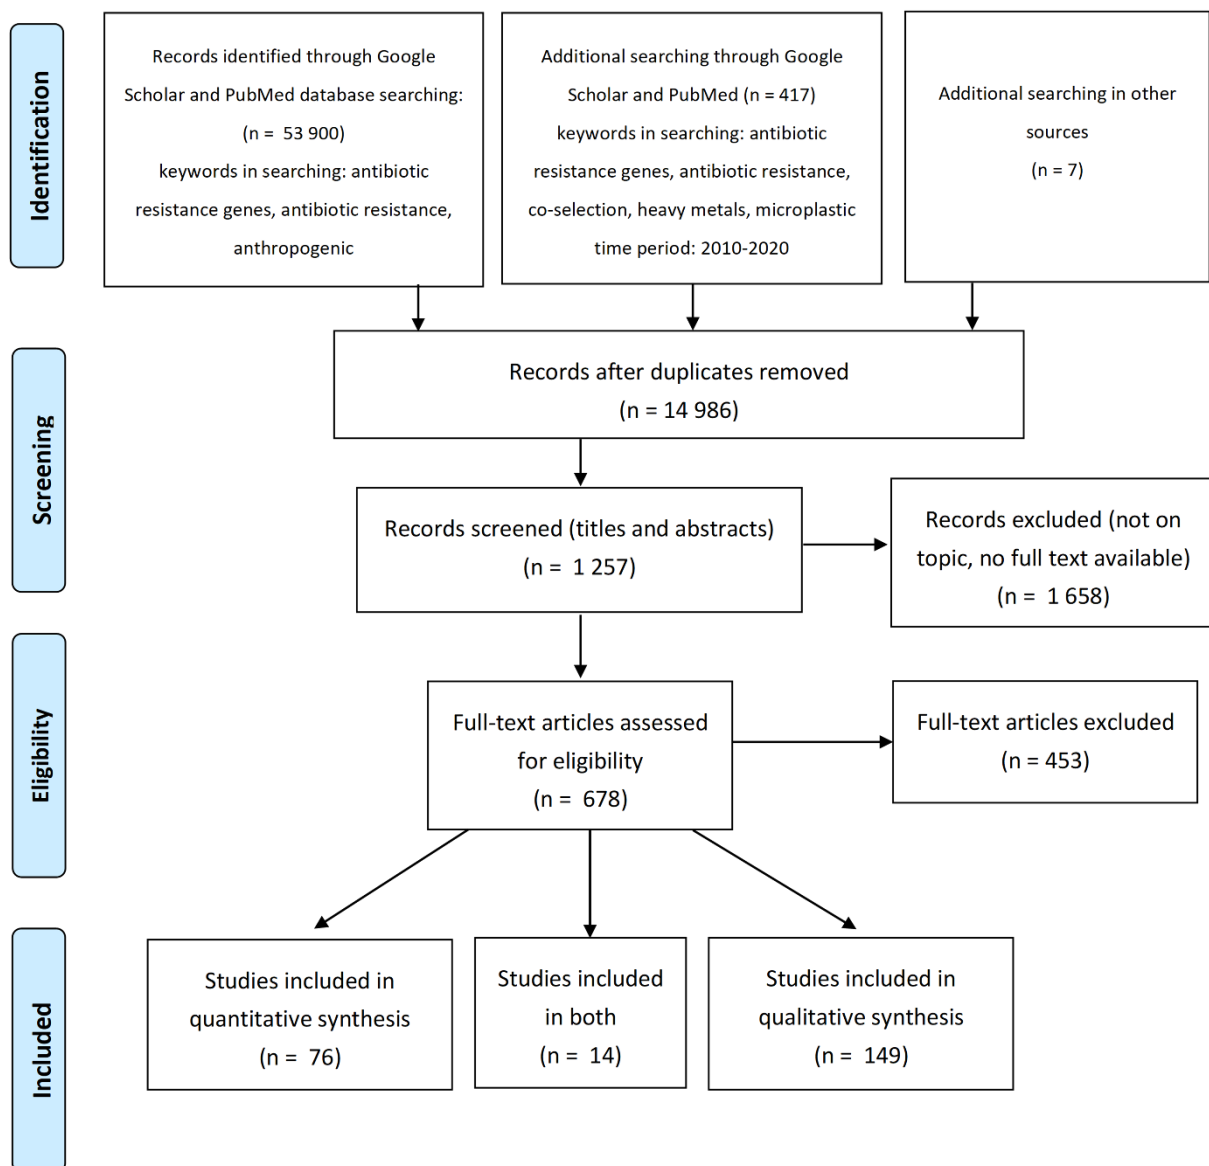

From: Moher D, Liberati A, Tetzlaff J, Altman DG, The PRISMA Group (2009). Preferred Reporting Items for Systematic Reviews and Meta-Analyses: The PRISMA Statement. PLoS Med 6(7): e1000097. doi:10.1371/journal.pmed1000097

For more information, visit [www.prisma-statement.org](http://www.prisma-statement.org).

**Figure S1.** PRISMA flowchart showing the results of the publication's search and screening process for this review.

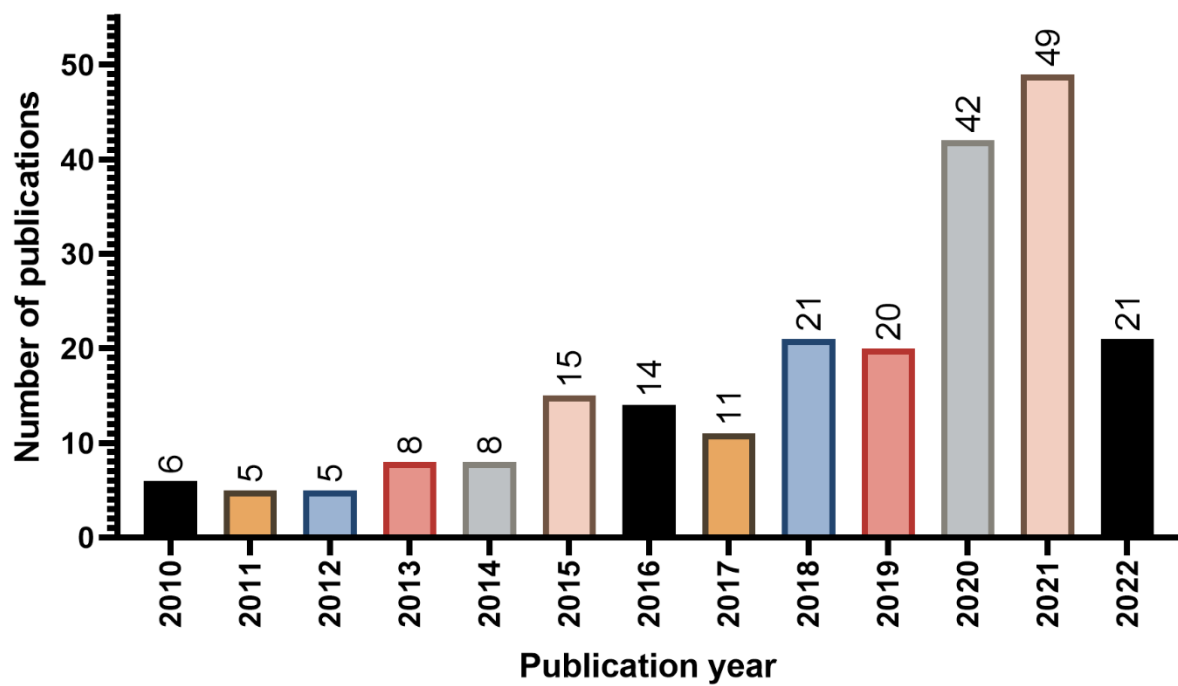

**Figure S2.** The number and date of publications used to develop this review.
